# Supplementary material
Source: publisher figshare collection journal article supplement (https://tandf.figshare.com/ndownloader/files/20065433)
Supplement: Supplementary file 1 [file 20065433]

## Supplementary Figures

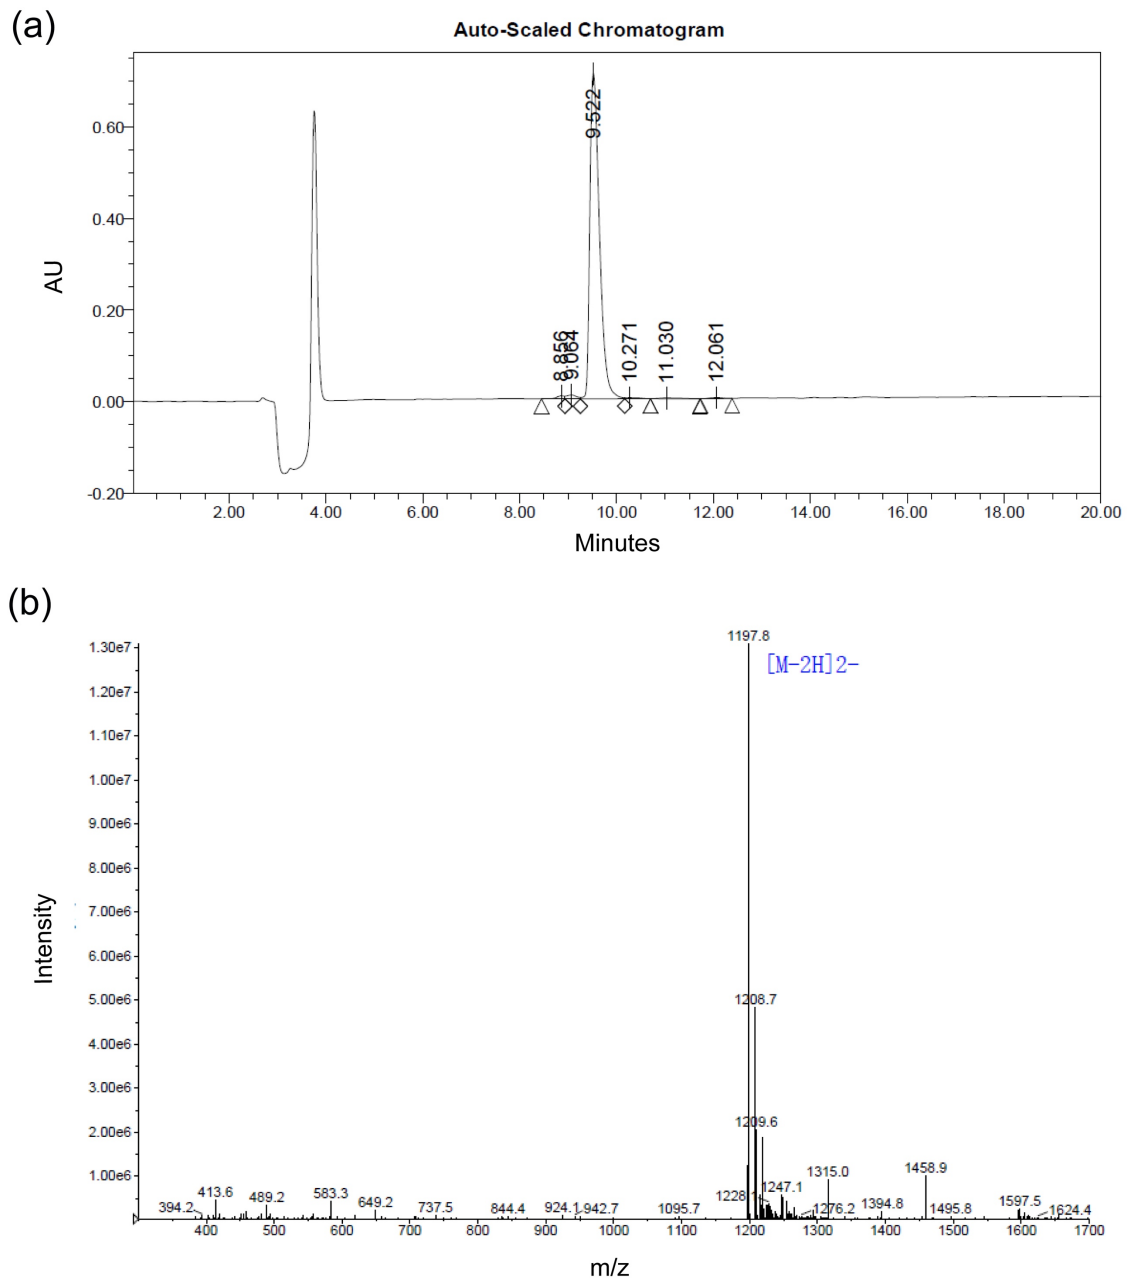

**Figure S1. Characterization of AK<sub>81-100</sub> (LFDPIIEDYH VGFKQTDKHP).** (a) HPLC Chromatograms of AK<sub>81-100</sub>. (b) LC-MS spectrum of AK<sub>81-100</sub>. The molecular weight of AK<sub>81-100</sub> is 2399.68 Da.

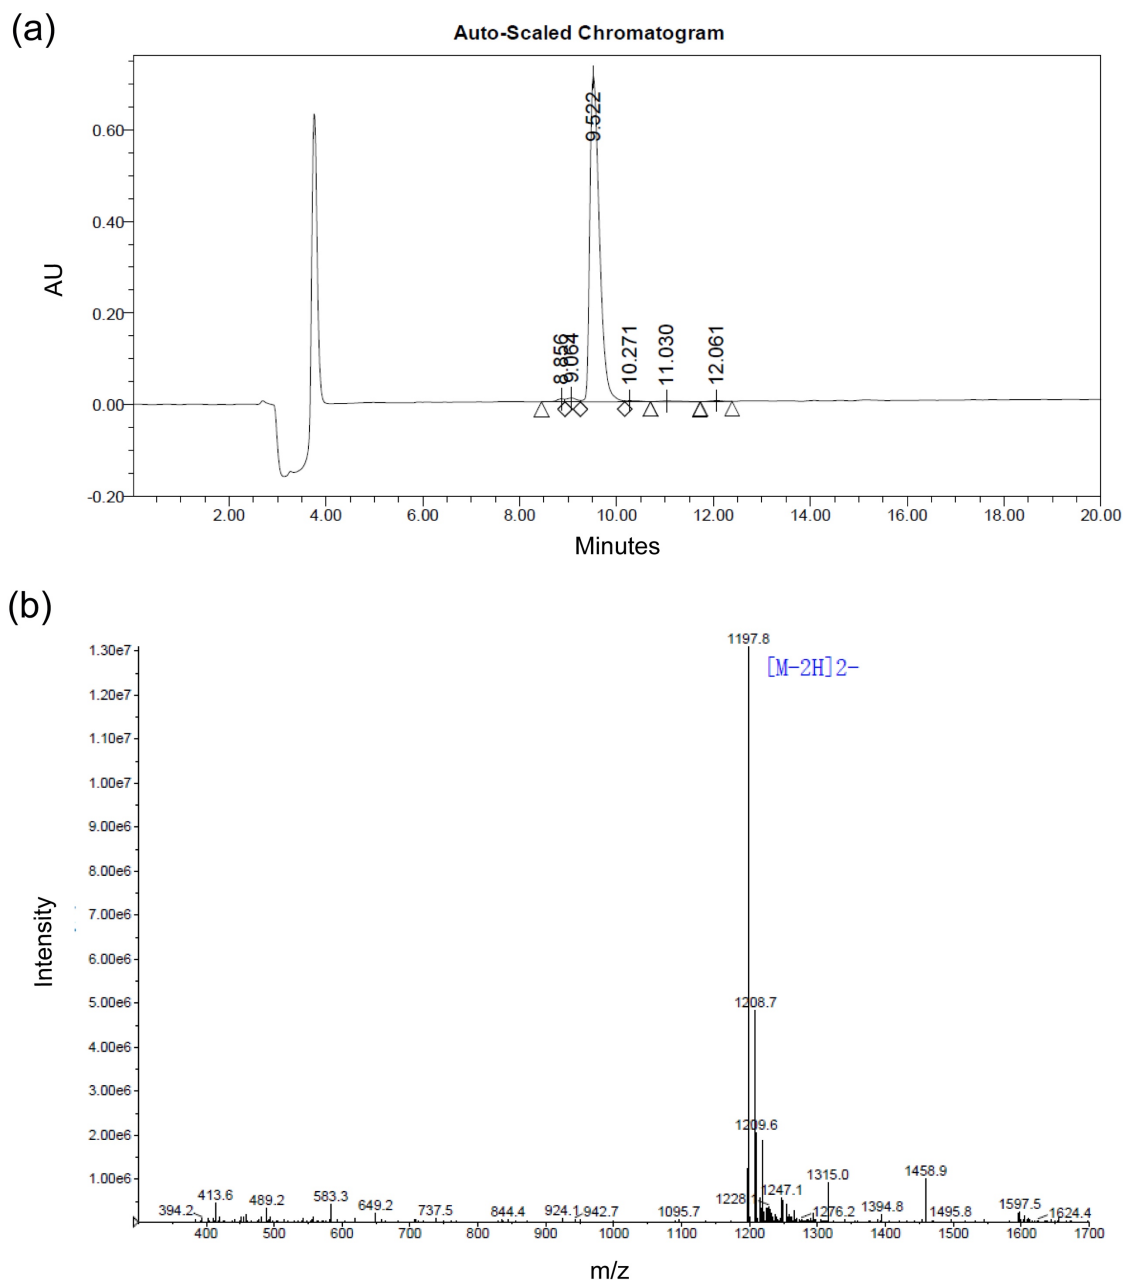

**Figure S2. Characterization of the resultant CpG-AKp NPs.** (a) The particle size distribution of CpG-AKp NPs were determined by DLS. Each sample was measured in triplicate (12 scans); (b) Transmission electron microscope of CpG-AKp NPs. One drop of the CpG-AKp NPs was placed on a 300-mesh copper grid, air-dried, and negatively stained with 2% (w/v) uranyl acetate for observation. The scale bar is 200 nm.
